# Supplementary material for: Iron imidazolate framework as precursor for electrocatalysts in polymer electrolyte membrane fuel cells
Source: Royal Society of Chemistry journal article supplement (doi:10.1039/c2sc20657a), 2012-01-01
Supplement: c2sc20657a.pdf [file c2sc20657a.pdf]

Supplementary Information for

“Iron imidazolate framework as precursor for electrocatalysts  
in polymer electrolyte membrane fuel cells”

Dan Zhao,<sup>a†</sup> Jiang-Lan Shui,<sup>a†</sup> Chen Chen,<sup>a</sup> Xinqi Chen,<sup>b</sup> Briana M. Repragle,<sup>a</sup> Dapeng  
Wang<sup>a</sup> and Di-Jia Liu<sup>\*a</sup>

<sup>†</sup> *These authors contributed equally to this work*

<sup>a</sup> *Chemical Sciences and Engineering Division, Argonne National Laboratory, Argonne, IL 60439, USA. Fax: +1 630  
972 4176; Tel: +1 630 252 4511; E-mail: [djliu@anl.gov](mailto:djliu@anl.gov)*

<sup>b</sup> *Department of Mechanical Engineering, Northwestern University, Evanston, IL 60208, USA.*

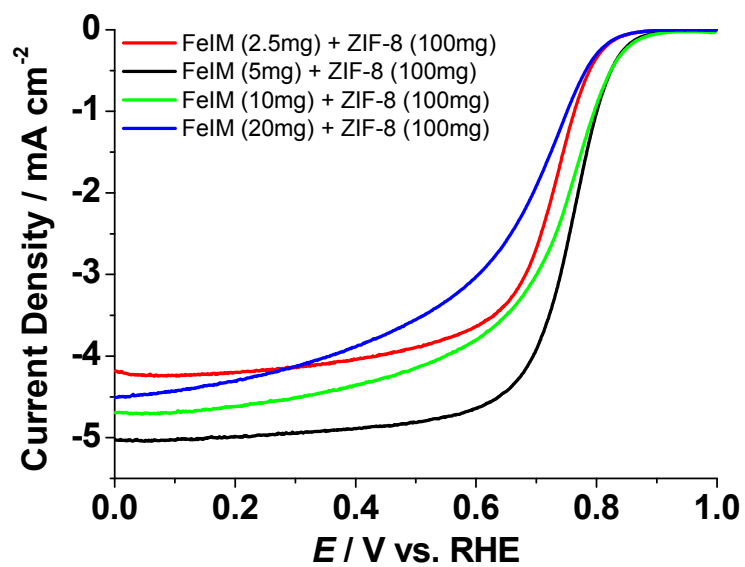

**Fig. S1** ORR polarization curves of the catalysts prepared with different FeIM to ZIF-8 weight ratios measured by the RRDE method. The test conditions are similar to that described in the main text.

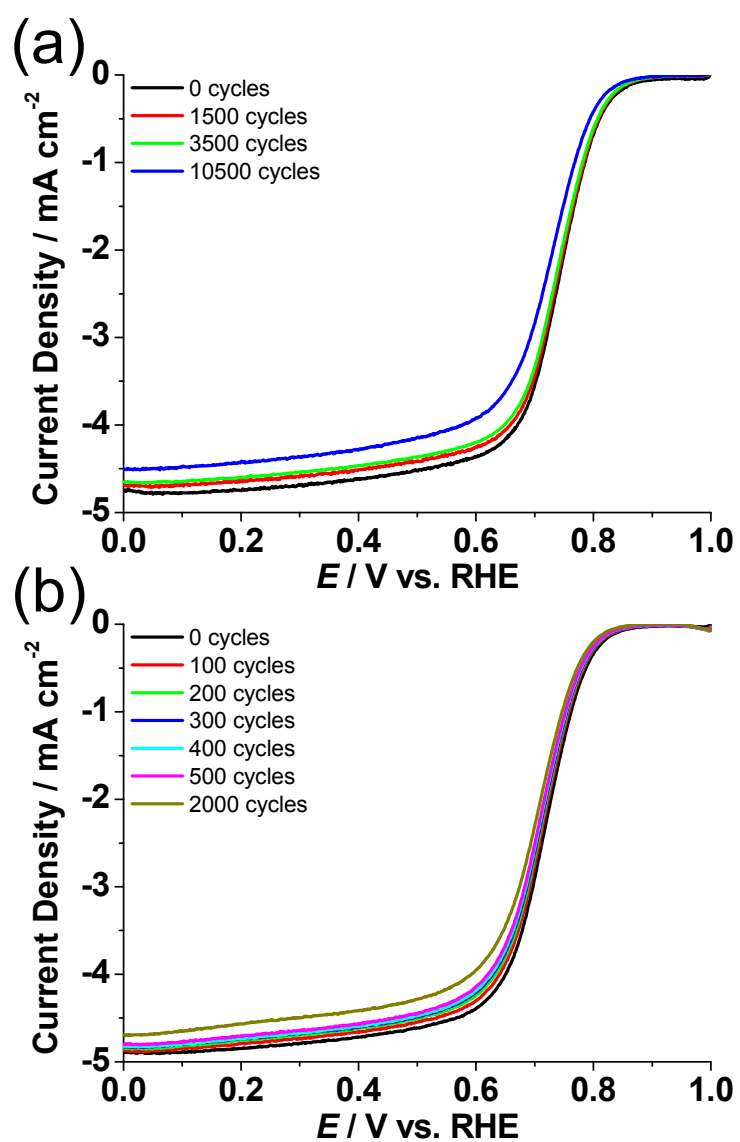

**Fig. S2** ORR polarization curves of FeIM/ZIF-8 measured during RRDE stability test. The test conditions include cycling from 0.0 to 1.1 V at 50 mV s<sup>-1</sup> in (a) 0.1 M Ar-purged HClO<sub>4</sub> or (b) 0.1 M O<sub>2</sub>-purged HClO<sub>4</sub> at 25 °C for multiple cycles, followed by polarization curve measurement in O<sub>2</sub>-purged HClO<sub>4</sub> at the scan rate of 10 mV s<sup>-1</sup>.
